# Supplementary material
Source: PubMed Central journal article supplement (PMC5949975)
Supplement: Supplemental_Material.pdf [file Supplemental_Material.pdf]

**Supp. table 1** PPIs treatment protocol of five phenotypes of heartburn patients based on Rome IV criteria

| PPIs treatment |        |           | RE(N=59) | NERD(N=28) | RH(N=36) | FH(N=78) | Unclassified(N=32) | <i>P</i> value |
|----------------|--------|-----------|----------|------------|----------|----------|--------------------|----------------|
| Type           | Dosage | Frequency |          |            |          |          |                    |                |
| Esomeprazole   | 20mg   | BID       | 39       | 15         | 22       | 45       | 25                 | 0.791          |
|                |        | QD        | 4        | 3          | 2        | 5        | 0                  |                |
|                | 40mg   | QD        | 1        | 0          | 0        | 0        | 0                  |                |
| Rabeprazole    | 10mg   | BID       | 7        | 3          | 3        | 7        | 4                  |                |
|                |        | QD        | 3        | 2          | 6        | 8        | 1                  |                |
|                | 20mg   | QD        | 1        | 0          | 0        | 0        | 0                  |                |
| Omeprazole     | 10mg   | BID       | 0        | 1          | 0        | 2        | 0                  |                |
|                |        | QD        | 1        | 0          | 0        | 2        | 0                  |                |
|                | 20mg   | QD        | 0        | 0          | 0        | 2        | 0                  |                |
| Lansoprazole   | 30mg   | BID       | 0        | 2          | 1        | 2        | 0                  |                |
|                |        | QD        | 0        | 1          | 1        | 0        | 0                  |                |
| Pantoprazole   | 40mg   | BID       | 0        | 0          | 0        | 2        | 1                  |                |
|                |        | QD        | 2        | 1          | 1        | 2        | 0                  |                |
| Ilaprazole     | 10mg   | QD        | 1        | 0          | 0        | 1        | 1                  |                |

\*p < 0.05. RE, reflux esophagitis. NERD, non-erosive gastroesophageal reflux disease. RH, reflux hypersensitivity. FH, functional heartburn. BID, twice a day. QD, once a day.
